# Supplementary material for: Anti-Colorectal Cancer Effects of Inonotus hispidus (Bull.: Fr.) P. Karst. Spore Powder through Regulation of Gut Microbiota-Mediated JAK/STAT Signaling
Source: MDPI journal article supplement (doi:10.3390/nu14163299), 2022-08-12
Supplement: s1 [file s1]

## Supplementary Date

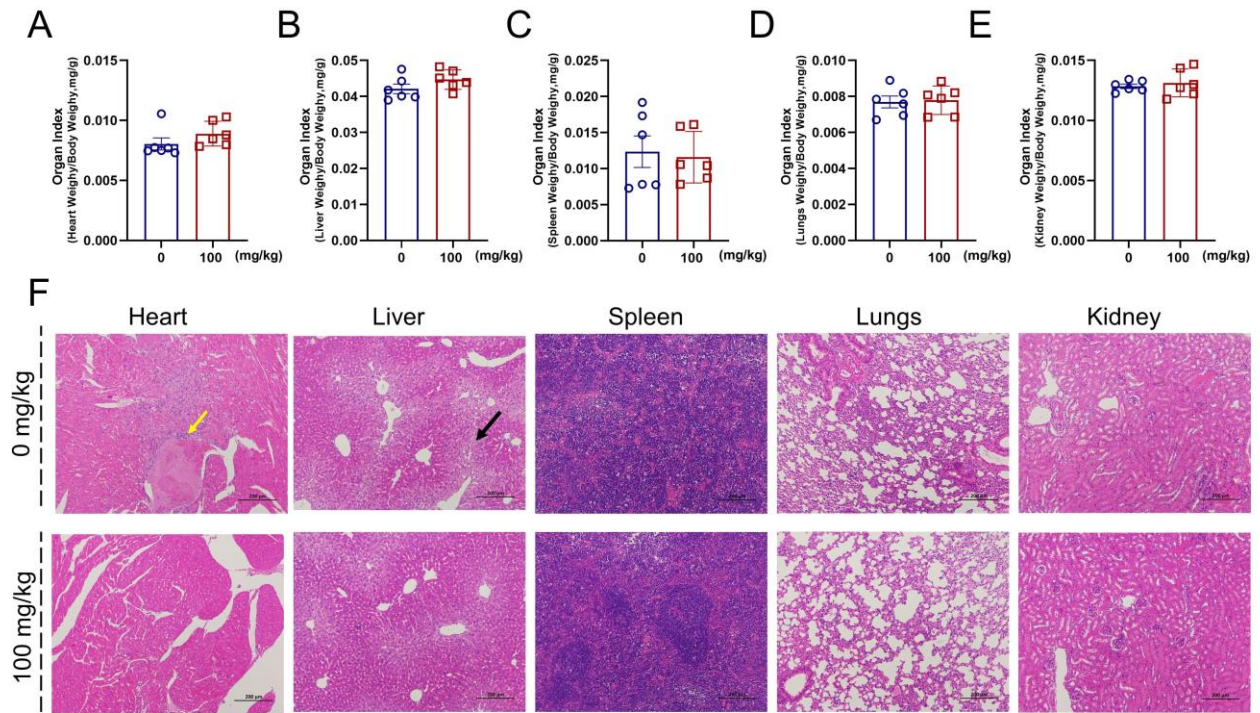

**Figure S1. Observation of mice organ index and viscera (heart, liver, spleen, lungs, and kidney) H&E staining.** *Inonotus hispidus* (Bull.:Fr.) P. Karst. spore powder (IHS) shows no significant effects on organ indexes of (A) heart, (B) liver, (C) spleen, (D) lung, and (E) kidney. (F) Vehicle-treated mice with inflammatory cell infiltration in the heart (yellow arrow) and a large amount of hepatocyte hydropic degeneration with loose and lightly stained cytoplasm in the liver (black arrow), and no significant changes on other organ structures including spleen, lung, and kidney analyzed by H&E staining (200 $\times$ , 100  $\mu$ m). The data are shown as means  $\pm$  SEM.

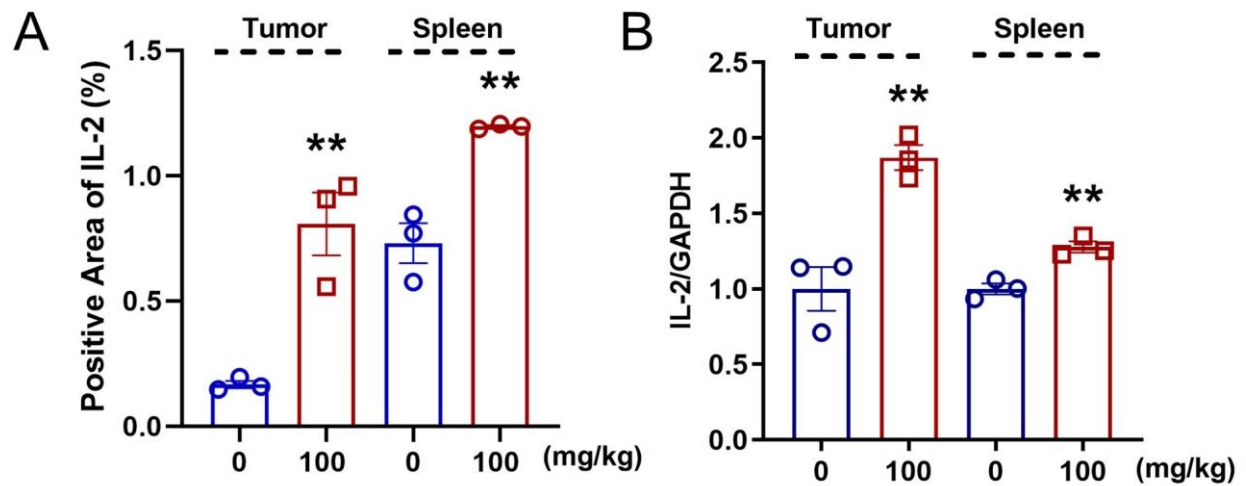

**Figure S2. IHS regulates IL-2 levels in tumors and spleens of *Apc<sup>Min/+</sup>* mice.** (A) Quantification of immunohistochemistry in Figure 3H. (B) Quantification of protein signals in Figure 3I normalized to GAPDH. The data are shown as means  $\pm$  SEM. \*\* $p < 0.01$  vs. vehicle-treated group.

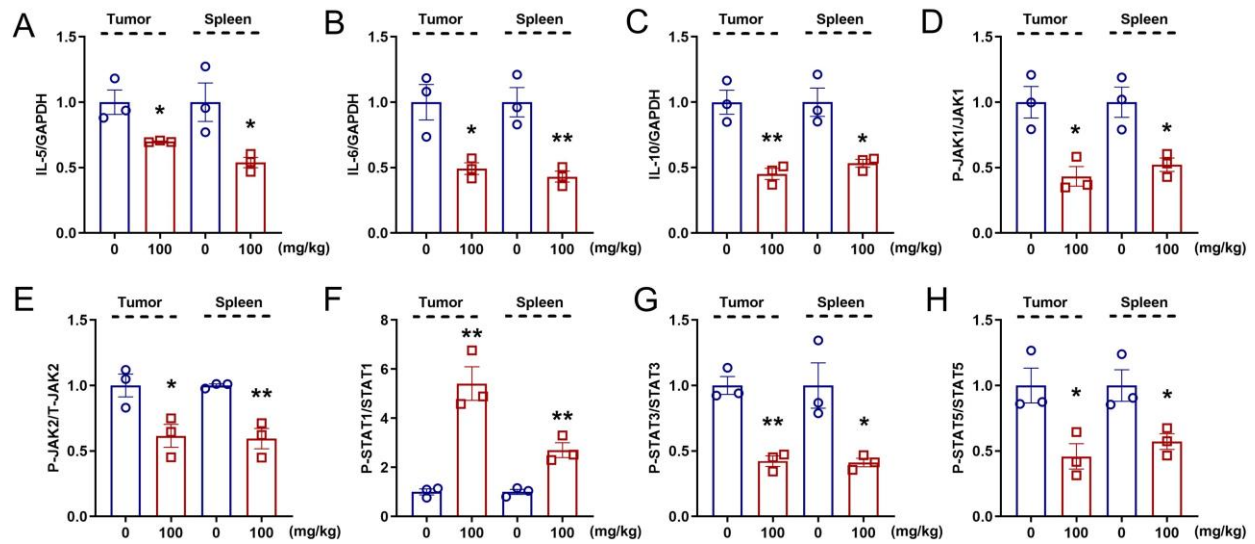

**Figure S3. Quantification of protein signals in Figure 5A, B normalized to GAPDH.** The levels of (A) IL-5, (B) IL-6, (C) IL-10, (D) P-JAK1/JAK1, (E) P-STAT1/STAT1, (F) P-JAK2/JAK2, (G) P-STAT3/STAT3, and (H) P-STAT5/STAT5 in tumor and spleen tissue of *Apc<sup>Min/+</sup>* mice. The data are shown as means  $\pm$  SEM. \* $p < 0.05$ , \*\* $p < 0.01$  vs. vehicle-treated group.

**Table S1.** Details of antibodies used in Western blot.

| <b>Antibody</b>                    | <b>Molecular weight</b> | <b>Catalog number</b> | <b>Dilution</b> | <b>Company</b>               | <b>Area</b>           |
|------------------------------------|-------------------------|-----------------------|-----------------|------------------------------|-----------------------|
| IL-2                               | 18kDa                   | A16317                | 1:1000          | ABclonal                     | Wuhan, China          |
| IL-5                               | 15kDa                   | A7690                 | 1:1000          | ABclonal                     | Wuhan, China          |
| IL-6                               | 23kDa                   | A11115                | 1:1000          | ABclonal                     | Wuhan, China          |
| IL-10                              | 20kDa                   | A2171                 | 1:1000          | ABclonal                     | Wuhan, China          |
| Phospho-JAK1<br>(Tyr1022, Tyr1023) | 133kDa                  | 44-422G               | 1:1000          | Invitrogen                   | Waltham, MA,<br>USA   |
| JAK1 [EPR349(N)]                   | 130kDa                  | ab133666              | 1:1000          | Abcam                        | Cambridge,<br>MA, USA |
| JAK2 (phospho<br>Y1007 + Y1008)    | 125kDa                  | ab68268               | 1:5000          | Abcam                        | Cambridge,<br>MA, USA |
| JAK2                               | 125kDa                  | 3230s                 | 1:1000          | Cell Signaling<br>Technology | Danvers, MA,<br>USA   |
| Phospho-STAT1-<br>Y701             | 91kDa                   | AP0054                | 1:1000          | ABclonal                     | Wuhan, China          |
| STAT1                              | 84kDa                   | A0027                 | 1:1000          | ABclonal                     | Wuhan, China          |
| STAT3 (phospho<br>Y705)            | 88kDa                   | ab76315               | 1:1000          | Abcam                        | Cambridge,<br>MA, USA |
| STAT3                              | 92kDa                   | 06-596                | 1:1000          | MILLIPORE                    | Darmstadt,<br>Germany |
| Phospho-STAT5A-<br>Y694            | 90kDa                   | AP0758                | 1:1000          | ABclonal                     | Wuhan, China          |
| STAT5A                             | 86/90kDa                | A11779                | 1:1000          | ABclonal                     | Wuhan, China          |
| GAPDH                              | 37kDa                   | E-AB-20032            | 1:2000          | Elabscience                  | Wuhan, China          |
| Goat Anti-Rabbit<br>(H+L)          | /                       | E-AB-1003             | 1:4000          | Elabscience                  | Wuhan, China          |
| Goat-Anti-Mouse<br>(H+L)           | /                       | E-AB-1001             | 1:4000          | Elabscience                  | Wuhan, China          |

**Table S2.** Relative abundance of top 20 genera.

| <b>Sample</b>           | <b>Vehicle-treaded mice</b> | <b>IHS-treaded mice</b> |
|-------------------------|-----------------------------|-------------------------|
| <i>Oscillospira</i>     | 0.097955                    | 0.169959                |
| <i>Allobaculum</i>      | 0.082144                    | 0.059823                |
| <i>Lactobacillus</i>    | 0.114726                    | 0.024105                |
| <i>Shigella</i>         | 0.110002                    | 0.004176                |
| <i>Akkermansia</i>      | 0.031809                    | 0.027953                |
| <i>Parabacteroides</i>  | 0.020029                    | 0.017694                |
| <i>Rikenella</i>        | 0.009729                    | 0.014764                |
| <i>Mucispirillum</i>    | 0.012772                    | 0.011265                |
| <i>Odoribacter</i>      | 0.008289                    | 0.010785                |
| <i>Ruminococcus</i>     | 0.011723                    | 0.00439                 |
| [ <i>Ruminococcus</i> ] | 0.006066                    | 0.009914                |
| <i>Desulfovibrio</i>    | 0.004181                    | 0.010036                |
| <i>Clostridium</i>      | 0.00383                     | 0.006955                |
| <i>Adlercreutzia</i>    | 0.001485                    | 0.004333                |
| <i>Dehalobacterium</i>  | 0.002346                    | 0.003399                |
| <i>Coprococcus</i>      | 0.001195                    | 0.003756                |
| <i>Halomonas</i>        | 0.001968                    | 0.000947                |
| <i>Bifidobacterium</i>  | 0.00106                     | 0.000879                |
| <i>AF12</i>             | 0.001076                    | 0.000843                |
| <i>Alistipes</i>        | 0.000426                    | 0.000742                |

---

Data are presented as the mean.

**Table S3.** Significantly different metabolites.

| <b>Adduct</b> | <b>Name</b>          | <b>VIP</b> | <b><i>p</i>-value</b> | <b>Mean of<br/>Vehicle-treated<br/>mice</b> | <b>Mean of<br/>IHS-treated<br/>mice</b> |
|---------------|----------------------|------------|-----------------------|---------------------------------------------|-----------------------------------------|
| (M+H)+        | <i>L</i> -Arginine   | 3.019092   | 0.004253              | 243848.3                                    | 459369.6                                |
| (M+H)+        | Phosphorylcholine    | 4.27844    | 0.019356              | 973718.3                                    | 379996.5                                |
| (M+H)+        | Lumichrome           | 1.161879   | 0.048048              | 120907.2                                    | 70138.07                                |
| (M-H)-        | Galactonic acid      | 1.169921   | 0.021808              | 106910                                      | 60121.02                                |
| (M-H)-        | Uracil               | 5.339849   | 0.032693              | 2482826                                     | 1438143                                 |
| (M-H)-        | Cholesteryl sulfate  | 1.191214   | 0.035847              | 97470.28                                    | 46365.46                                |
| (M-H)-        | Docosahexaenoic acid | 10.15721   | 0.043834              | 9970878                                     | 5480321                                 |

Adduct: Adduct ion information for compounds;

VIP: Variable importance for the projection of orthogonal partial least squares discriminant analysis (OPLS-DA).

**Table S4.** Annotation of the KEGG pathway for significantly different metabolites.

| Involved mechanism                        | Metabolite         |
|-------------------------------------------|--------------------|
| mTOR signaling pathway                    | <i>L</i> -Arginine |
| Chagas disease (American trypanosomiasis) | <i>L</i> -Arginine |
| Amyotrophic lateral sclerosis (ALS)       | <i>L</i> -Arginine |
| D-Arginine and D-ornithine metabolism     | <i>L</i> -Arginine |
| Choline metabolism in cancer              | Phosphorylcholine  |
| Amoebiasis                                | <i>L</i> -Arginine |
| Riboflavin metabolism                     | Lumichrome         |
| Arginine biosynthesis                     | <i>L</i> -Arginine |
| Pantothenate and CoA biosynthesis         | Uracil             |
| beta-Alanine metabolism                   | Uracil             |
